# Supplementary material for: Hydrolysis of three different head groups phospholipids by chicken group V phospholipase A2 using the monomolecular film technique
Source: Oxford University Press journal article supplement (doi:10.1042/bsr20192053), 2020-01-01
Supplement: bsr-2019-2053_supp.pdf [file bsr-2019-2053_supp.pdf]

Supplementary file.

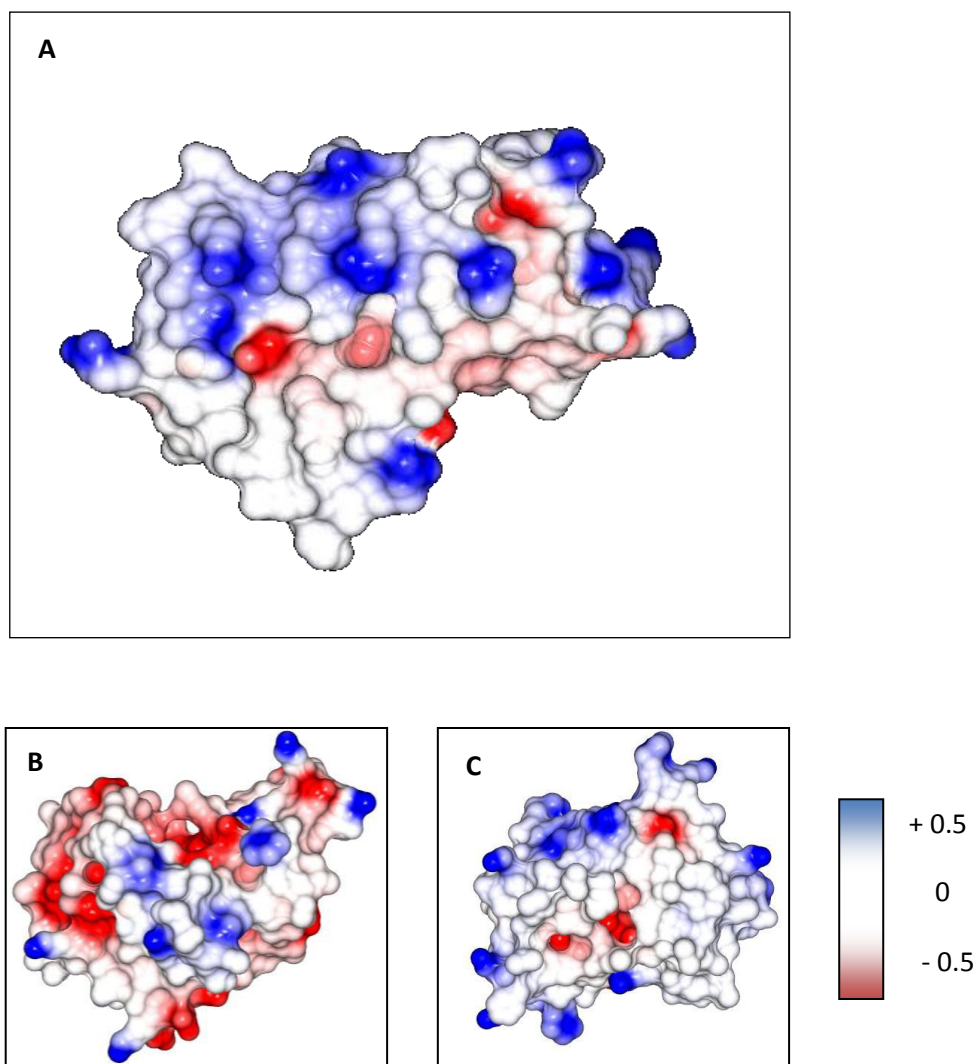

**Supplementary figure S1** Surface GRASP representations of ChPLA2-V (A), ChPLA2-IB (B) and ChPLA2-IIA (C). Using the CCP4MG programme, the potential substrate binding surfaces are represented by Van der Waals's colored code where red and blue represent a negative net charge and positive charge, respectively. Whereas, white colour represent the total neutral positions.
